# Supplementary material for: Blood-Based Biomarker Analysis for Predicting Efficacy of Chemoradiotherapy and Durvalumab in Patients with Unresectable Stage III Non-Small Cell Lung Cancer
Source: MDPI journal article supplement (doi:10.3390/cancers15041151), 2023-02-10
Supplement: s1 [file s1]

# Blood-Based Biomarker Analysis for Predicting Efficacy of Chemoradiotherapy and Durvalumab in Patients with Unresectable Stage III Non-Small Cell Lung Cancer

Cheol-Kyu Park <sup>1</sup>, Sung-Woo Lee <sup>2,3</sup>, Hyun-Ju Cho <sup>1</sup>, Hyung-Joo Oh <sup>1</sup>, Young-Chul Kim <sup>1</sup>, Yong-Hyub Kim <sup>4</sup>, Sung-Ja Ahn <sup>4</sup>, Jae-Ho Cho <sup>2,3,5</sup> and In-Jae Oh <sup>1,\*</sup>

**Supplementary Table S1.** Longitudinal monitoring of CTC and PBC counts in patients on concurrent chemoradiotherapy (CCRT) alone and durvalumab consolidation (DC).

|                                        | C0              | C1              | <i>p</i> -value<br>(C0 vs C1) | C2              | <i>p</i> -value<br>(C1 vs C2) | C3              | <i>p</i> -value<br>(C1 vs C3) | C5             | <i>p</i> -value<br>(C1 vs C5) |
|----------------------------------------|-----------------|-----------------|-------------------------------|-----------------|-------------------------------|-----------------|-------------------------------|----------------|-------------------------------|
| <b>CTC, /7.5mL [Total]</b>             | 4.5 (6.5)       | 14.4 (29.6)     | 0.335                         | -               | -                             | -               | -                             | 4.9 (9.3)      | 0.030                         |
| CCRT alone ( <i>n</i> = 27)            | 2.7 (4.1)       | 22.7 (41.9)     | 0.177                         | -               | -                             | -               | -                             | 4.8 (8.7)      | 0.173                         |
| DC ( <i>n</i> = 20)                    | 6.8 (8.2)       | 7.7 (9.9)       | 0.983                         | 5.7 (11.6)      | 0.277                         | 6.0 (14.6)      | 0.570                         | 5.0 (10.0)     | 0.093                         |
| <b>CTC cluster, /7.5mL [Total]</b>     | 0.8 (1.4)       | 3.4 (10.4)      | 0.946                         | -               | -                             | -               | -                             | 0.5 (1.0)      | 0.379                         |
| CCRT alone ( <i>n</i> = 27)            | 0.7 (1.5)       | 6.7 (15.0)      | 0.507                         | -               | -                             | -               | -                             | 0.5 (1.2)      | 0.407                         |
| DC ( <i>n</i> = 20)                    | 0.9 (1.3)       | 0.7 (0.8)       | 0.550                         | 0.5 (1.1)       | 0.527                         | 1.0 (3.0)       | 0.688                         | 0.4 (0.9)      | 0.562                         |
| <b>ANC, ×10<sup>3</sup>/μL [Total]</b> | 6.4 (2.9)       | 3.4 (1.7)       | <0.001                        | -               | -                             | -               | -                             | 4.4 (2.0)      | <0.001                        |
| CCRT alone ( <i>n</i> = 27)            | 6.9 (3.4)       | 3.6 (2.0)       | <0.001                        | -               | -                             | -               | -                             | 4.9 (2.5)      | 0.001                         |
| DC ( <i>n</i> = 23)                    | 5.9 (2.2)       | 3.1 (1.2)       | <0.001                        | 4.0 (1.7)       | 0.005                         | 4.0 (1.5)       | 0.008                         | 3.8 (1.2)      | 0.005                         |
| <b>ALC, ×10<sup>3</sup>/μL [Total]</b> | 1.7 (0.6)       | 1.0 (0.4)       | <0.001                        | -               | -                             | -               | -                             | 1.1 (0.3)      | 0.393                         |
| CCRT alone ( <i>n</i> = 27)            | 1.7 (0.6)       | 1.0 (0.4)       | <0.001                        | -               | -                             | -               | -                             | 1.1 (0.3)      | 0.779                         |
| DC ( <i>n</i> = 23)                    | 1.8 (0.6)       | 1.0 (0.4)       | <0.001                        | 1.1 (0.4)       | 0.140                         | 1.1 (0.4)       | 0.313                         | 1.1 (0.4)      | 0.151                         |
| <b>PLT, ×10<sup>3</sup>/μL [Total]</b> | 290.2 (88.6)    | 209.6 (57.1)    | <0.001                        | -               | -                             | -               | -                             | 226.3 (82.8)   | 0.068                         |
| CCRT alone ( <i>n</i> = 27)            | 306.7 (92.9)    | 217.4 (58.3)    | <0.001                        | -               | -                             | -               | -                             | 241.5 (87.5)   | 0.077                         |
| DC ( <i>n</i> = 23)                    | 270.9 (81.0)    | 200.8 (55.6)    | <0.001                        | 222.2 (115.9)   | 0.422                         | 219.3 (99.2)    | 0.117                         | 210.4 (76.5)   | 0.390                         |
| <b>NLR [Total]</b>                     | 4.44 (4.00)     | 4.41 (6.76)     | 0.459                         | -               | -                             | -               | -                             | 4.45 (2.93)    | 0.003                         |
| CCRT alone ( <i>n</i> = 27)            | 5.13 (5.11)     | 5.43 (9.14)     | 0.694                         | -               | -                             | -               | -                             | 5.05 (3.65)    | 0.010                         |
| DC ( <i>n</i> = 23)                    | 3.62 (1.85)     | 3.26 (1.51)     | 0.484                         | 4.19 (2.84)     | 0.259                         | 4.04 (2.15)     | 0.351                         | 3.82 (1.78)    | 0.126                         |
| <b>PLR [Total]</b>                     | 188.11 (97.84)  | 255.61 (223.57) | 0.003                         | -               | -                             | -               | -                             | 222.58 (91.36) | 0.946                         |
| CCRT alone ( <i>n</i> = 27)            | 210.12 (115.74) | 291.29 (294.81) | 0.069                         | -               | -                             | -               | -                             | 236.73 (94.35) | 0.351                         |
| DC ( <i>n</i> = 23)                    | 162.28 (64.81)  | 215.28 (84.19)  | 0.021                         | 237.93 (186.45) | 0.339                         | 224.26 (127.59) | 0.823                         | 207.73 (88.03) | 0.332                         |

Values are presented as mean (SD). SD, standard deviation; CTC, circulating tumor cell; PBC, peripheral blood cell; ANC, absolute neutrophil count; ALC, absolute lymphocyte count; PLT, platelet; NLR, neutrophil-to-lymphocyte ratio; PLR, platelet-to-lymphocyte ratio.

**Supplementary Table S2.** PFS analysis according to CTC and PBC counts.

|                                             | Median PFS (95% CI) | <i>p</i> -value | HR (95% CI)       | <i>p</i> -value |
|---------------------------------------------|---------------------|-----------------|-------------------|-----------------|
| CTC C0                                      |                     | 0.441           |                   | 0.443           |
| No ( <i>n</i> = 13)                         | 12.4 (3.2–21.7)     |                 | 1 (reference)     |                 |
| Yes ( <i>n</i> = 34)                        | 13.5 (6.8–20.2)     |                 | 0.73 (0.33–1.62)  |                 |
| CTC cluster C0                              |                     | 0.441           |                   | 0.443           |
| No ( <i>n</i> = 25)                         | 15.0 (11.8–18.2)    |                 | 1 (reference)     |                 |
| Yes ( <i>n</i> = 18)                        | 17.1 (NR)           |                 | 0.73 (0.32–1.64)  |                 |
| CTC C1                                      |                     | 0.387           |                   | 0.393           |
| No ( <i>n</i> = 7)                          | NR (NR)             |                 | 1 (reference)     |                 |
| Yes ( <i>n</i> = 33)                        | 13.1 (8.5–17.6)     |                 | 1.69 (0.51–5.63)  |                 |
| CTC cluster C1                              |                     | 0.095           |                   | 0.101           |
| No ( <i>n</i> = 24)                         | 15.1 (6.1–24.2)     |                 | 1 (reference)     |                 |
| Yes ( <i>n</i> = 16)                        | 11.0 (8.7–13.3)     |                 | 1.89 (0.88–4.04)  |                 |
| CTC C0 to C1                                |                     | 0.707           |                   | 0.708           |
| Cleared ( <i>n</i> = 6)                     | 10.0 (NR)           |                 | 1 (reference)     |                 |
| Residual ( <i>n</i> = 31)                   | 13.5 (9.0–18.1)     |                 | 1.26 (0.38–4.23)  |                 |
| CTC cluster C0 to C1                        |                     | 0.032           |                   | 0.037           |
| Cleared ( <i>n</i> = 23)                    | 27.8 (9.8–45.7)     |                 | 1 (reference)     |                 |
| Residual ( <i>n</i> = 14)                   | 11.0 (8.8–13.1)     |                 | 2.37 (1.05–5.34)  |                 |
| CTC cluster C0 to C1 [DC]                   |                     | 0.034           |                   | 0.047           |
| Cleared ( <i>n</i> = 11)                    | NR (NR)             |                 | 1 (reference)     |                 |
| Residual ( <i>n</i> = 8)                    | 9.5 (6.3–12.8)      |                 | 3.54 (1.02–12.28) |                 |
| CTC cluster C0 to C1 [CCRT alone]           |                     | 0.359           |                   | 0.364           |
| Cleared ( <i>n</i> = 12)                    | 8.5 (0.0–22.8)      |                 | 1 (reference)     |                 |
| Residual ( <i>n</i> = 6)                    | 13.5 (8.1–18.9)     |                 | 1.67 (0.55–5.04)  |                 |
| ANC C0                                      |                     | 0.253           |                   | 0.256           |
| Low ( <i>n</i> = 25)                        | 15.1 (10.7–19.5)    |                 | 1 (reference)     |                 |
| High ( <i>n</i> = 25)                       | 11.7 (8.6–17.5)     |                 | 1.50 (0.75–3.02)  |                 |
| ALC C0                                      |                     | 0.377           |                   | 0.379           |
| Low ( <i>n</i> = 25)                        | 8.7 (6.5–11.0)      |                 | 1 (reference)     |                 |
| High ( <i>n</i> = 25)                       | 15.1 (11.0–19.3)    |                 | 0.73 (0.37–1.47)  |                 |
| PLT C0                                      |                     | 0.609           |                   | 0.610           |
| Low ( <i>n</i> = 26)                        | 13.1 (7.6–18.5)     |                 | 1 (reference)     |                 |
| High ( <i>n</i> = 24)                       | 12.4 (7.0–17.8)     |                 | 1.20 (0.60–2.40)  |                 |
| NLR C0                                      |                     | 0.213           |                   | 0.217           |
| Low ( <i>n</i> = 25)                        | 15.1 (10.7–19.5)    |                 | 1 (reference)     |                 |
| High ( <i>n</i> = 25)                       | 9.5 (3.9–15.1)      |                 | 1.56 (0.77–3.17)  |                 |
| PLR C0                                      |                     | 0.655           |                   | 0.656           |
| Low ( <i>n</i> = 25)                        | 15.0 (11.4–18.7)    |                 | 1 (reference)     |                 |
| High ( <i>n</i> = 25)                       | 12.4 (7.0–17.8)     |                 | 1.17 (0.58–2.38)  |                 |
| ANC C1                                      |                     | 0.681           |                   | 0.682           |
| Low ( <i>n</i> = 25)                        | 12.4 (8.8–16.1)     |                 | 1 (reference)     |                 |
| High ( <i>n</i> = 24)                       | 15.0 (12.1–18.0)    |                 | 1.16 (0.57–2.35)  |                 |
| ALC C1                                      |                     | 0.851           |                   | 0.851           |
| Low ( <i>n</i> = 25)                        | 15.1 (7.4–22.9)     |                 | 1 (reference)     |                 |
| High ( <i>n</i> = 24)                       | 12.7 (6.6–18.9)     |                 | 1.07 (0.53–2.17)  |                 |
| PLT C1                                      |                     | 0.174           |                   | 0.179           |
| Low ( <i>n</i> = 25)                        | 17.1 (7.9–26.3)     |                 | 1 (reference)     |                 |
| High ( <i>n</i> = 24)                       | 12.4 (5.1–19.8)     |                 | 1.63 (0.80–3.31)  |                 |
| PLT C1                                      |                     | <0.001          |                   | <0.001          |
| ≤252 × 10 <sup>3</sup> /μL ( <i>n</i> = 38) | 17.1 (13.4–20.8)    |                 | 1 (reference)     |                 |
| >252 × 10 <sup>3</sup> /μL ( <i>n</i> = 11) | 5.9 (3.2–8.6)       |                 | 4.15 (1.89–9.11)  |                 |
| PLT C1 [DC]                                 |                     | 0.027           |                   | 0.039           |
| ≤252 × 10 <sup>3</sup> /μL ( <i>n</i> = 18) | 15.0 (NR)           |                 | 1 (reference)     |                 |
| >252 × 10 <sup>3</sup> /μL ( <i>n</i> = 5)  | 5.2 (3.2–7.2)       |                 | 3.54 (1.07–11.71) |                 |
| PLT C1 [CCRT alone]                         |                     | 0.003           |                   | 0.007           |
| ≤252 × 10 <sup>3</sup> /μL ( <i>n</i> = 20) | 17.1 (13.7–20.5)    |                 | 1 (reference)     |                 |
| >252 × 10 <sup>3</sup> /μL ( <i>n</i> = 6)  | 5.9 (0.0–13.0)      |                 | 4.88 (1.55–15.40) |                 |
| NLR C1                                      |                     | 0.666           |                   | 0.667           |
| Low ( <i>n</i> = 24)                        | 13.5 (7.9–19.1)     |                 | 1 (reference)     |                 |
| High ( <i>n</i> = 24)                       | 13.1 (6.0–20.1)     |                 | 1.17 (0.57–2.40)  |                 |

|                       |                 |                  |       |
|-----------------------|-----------------|------------------|-------|
| PLR C1                |                 | 0.277            | 0.280 |
| Low ( <i>n</i> = 24)  | 15.0 (8.7–21.4) | 1 (reference)    |       |
| High ( <i>n</i> = 24) | 9.5 (4.1–15.0)  | 1.48 (0.73–3.01) |       |

PFS, progression-free survival; CTC, circulating tumor cell; PBC, peripheral blood cell; CI, confidence interval; HR, hazard ratio; NR, not reached; DC, durvalumab consolidation; CCRT, concurrent chemoradiotherapy; ANC, absolute neutrophil count; ALC, absolute lymphocyte count; PLT, platelet; NLR, neutrophil-to-lymphocyte ratio; PLR, platelet-to-lymphocyte ratio.

**Supplementary Table S3.** OS analysis according to CTC and PBC counts.

|                                             | Median OS (95% CI) | <i>p</i> -value | HR (95% CI)       | <i>p</i> -value |
|---------------------------------------------|--------------------|-----------------|-------------------|-----------------|
| CTC C0                                      |                    | 0.910           |                   | 0.910           |
| No ( <i>n</i> = 13)                         | 21.0 (NR)          |                 | 1 (reference)     |                 |
| Yes ( <i>n</i> = 34)                        | 22.7 (NR)          |                 | 0.95 (0.40–2.28)  |                 |
| CTC cluster C0                              |                    | 0.896           |                   | 0.896           |
| No ( <i>n</i> = 25)                         | NR (NR)            |                 | 1 (reference)     |                 |
| Yes ( <i>n</i> = 18)                        | 22.7 (NR)          |                 | 1.06 (0.45–2.52)  |                 |
| ANC C0                                      |                    | 0.002           |                   | 0.004           |
| Low ( <i>n</i> = 25)                        | NR (NR)            |                 | 1 (reference)     |                 |
| High ( <i>n</i> = 25)                       | 19.4 (17.5–21.4)   |                 | 3.46 (1.49–8.00)  |                 |
| ALC C0                                      |                    | 0.053           |                   | 0.059           |
| Low ( <i>n</i> = 25)                        | 19.4 (18.2–20.7)   |                 | 1 (reference)     |                 |
| High ( <i>n</i> = 25)                       | NR (NR)            |                 | 0.47 (0.21–1.03)  |                 |
| PLT C0                                      |                    | 0.558           |                   | 0.559           |
| Low ( <i>n</i> = 26)                        | NR (NR)            |                 | 1 (reference)     |                 |
| High ( <i>n</i> = 24)                       | 21.5 (16.5–26.5)   |                 | 1.26 (0.58–2.72)  |                 |
| NLR C0                                      |                    | <0.001          |                   | 0.001           |
| Low ( <i>n</i> = 26)                        | NR (NR)            |                 | 1 (reference)     |                 |
| High ( <i>n</i> = 24)                       | 19.0 (12.3–25.7)   |                 | 4.68 (1.95–11.26) |                 |
| PLR C0                                      |                    | 0.299           |                   | 0.302           |
| Low ( <i>n</i> = 25)                        | NR (NR)            |                 | 1 (reference)     |                 |
| High ( <i>n</i> = 25)                       | 21.0 (17.6–24.4)   |                 | 1.51 (0.69–3.29)  |                 |
| PLT C1                                      |                    | 0.012           |                   | 0.016           |
| ≤252 × 10 <sup>3</sup> /μL ( <i>n</i> = 38) | NR (NR)            |                 | 1 (reference)     |                 |
| >252 × 10 <sup>3</sup> /μL ( <i>n</i> = 11) | 19.0 (8.9–29.1)    |                 | 2.72 (1.21–6.14)  |                 |

OS, overall survival; CTC, circulating tumor cell; PBC, peripheral blood cell; CI, confidence interval; HR, hazard ratio; NR, not reached; DC, durvalumab consolidation; CCRT, concurrent chemoradiotherapy; ANC, absolute neutrophil count; ALC, absolute lymphocyte count; PLT, platelet; NLR, neutrophil-to-lymphocyte ratio; PLR, platelet-to-lymphocyte ratio.
